# Supplementary material
Source: PubMed Central journal article supplement (PMC6751477)
Supplement: iid-0004-0115-s01.pdf [file iid-0004-0115-s01.pdf]

Supplementary Table 1. Odds of requiring transition to prednisone therapy after budesonide MMX initiation, among patients with ulcerative colitis, unadjusted and adjusted analyses, including prior therapy exposures

|                                                             | <b>Unadjusted OR<br/>(95% CI)</b> | <b>Adjusted OR<sup>a</sup><br/>(95% CI)</b> |
|-------------------------------------------------------------|-----------------------------------|---------------------------------------------|
| <b>Male Sex</b>                                             | 2.64 (1.06 – 6.63)                | 2.73 (1.03 – 7.20)                          |
| <b>Age at diagnosis</b>                                     |                                   |                                             |
| ≤29 years                                                   | 2.47 (1.05 – 5.82)                | 2.92 (1.12 – 7.59)                          |
| >29 years                                                   | Reference                         | Reference                                   |
| <b>Disease extent</b>                                       |                                   |                                             |
| Proctitis                                                   | 0.75 (0.15 – 3.75)                | 0.55 (0.10 – 3.10)                          |
| Left-sided colitis                                          | Reference                         | Reference                                   |
| Extensive/pancolitis                                        | 0.73 (0.32 – 1.69)                | 0.55 (0.22 – 1.41)                          |
| <b>Concomitant therapy at budesonide<br/>MMX initiation</b> |                                   |                                             |
| No therapy                                                  | 0.85 (0.24 – 3.08)                | 0.70 (0.15 – 3.37)                          |
| Aminosalicylate                                             | Reference                         | Reference                                   |
| Biologic and/or immunomodulator                             | 1.07 (0.45 – 2.54)                | 0.63 (0.12 – 3.26)                          |
| <b>Prior therapy for ulcerative colitis</b>                 |                                   |                                             |
| No therapy                                                  | 0.67 (0.15 – 3.10)                | 1.14 (0.17 – 7.48)                          |
| Aminosalicylate                                             | Reference                         | Reference                                   |
| Immunomodulator                                             | 0.78 (0.26 – 2.37)                | 1.15 (0.20 – 6.72)                          |
| Biologic                                                    | 1.44 (0.47 – 4.44)                | 1.89 (0.27 – 13.0)                          |

odds ratio (OR), confidence interval (CI)

<sup>a</sup>All variables listed above were included in the final multivariable analysis

Supplementary Table 2. Comparison of new therapies initiated during the study period among patients who required transition to prednisone and those who remained on budesonide multimatrix system

|                            | <b>No transition to Prednisone (n=52)</b> |          | <b>Transition to Prednisone (n=44)</b> |          | <b>p-value</b> |
|----------------------------|-------------------------------------------|----------|----------------------------------------|----------|----------------|
|                            | <b>n</b>                                  | <b>%</b> | <b>n</b>                               | <b>%</b> |                |
| <b>New immunomodulator</b> | 6                                         | 12       | 6                                      | 14       | 0.230          |
| <b>New anti-TNF</b>        | 5                                         | 10       | 3                                      | 7        | 0.721          |
| <b>New vedolizumab</b>     | 4                                         | 8        | 1                                      | 2        | 0.371          |

Tumor necrosis factor (TNF)
